# Supplementary material for: Analysis of pyrethroids in cereals by HPLC with a deep eutectic solvent-based dispersive liquid–liquid microextraction with solidification of floating organic droplets
Source: Royal Society of Chemistry journal article supplement (doi:10.1039/d0ay02121k), 2020-12-30
Supplement: d0ay02121k1.pdf [file d0ay02121k1.pdf]

1 Supplementary material

2 **Analysis of pyrethroids in cereals by HPLC with a deep eutectic solvent-based**  
3 **dispersive liquid-liquid microextraction with solidification of floating organic**  
4 **droplets**

5

6 Beiqi Wu <sup>a, b</sup>, Zhengyan Guo <sup>b</sup>, Xiuting Li <sup>c</sup>, Xin Huang <sup>b</sup>, Chao Teng <sup>c</sup>, Zhenjia Chen  
7 <sup>c, b</sup>, Xu Jing <sup>b</sup>, Wenting Zhao <sup>d, \*</sup>

8

9 <sup>a</sup> *Faculty of Veterinary and Agricultural Sciences, The University of Melbourne,*  
10 *Parkville, Victoria 3010, Australia*

11 <sup>b</sup> *College of Food Science and Engineering, Shanxi Agricultural University, Taigu,*  
12 *Shanxi 030801, P.R. China*

13 <sup>c</sup> *Beijing Advanced Innovation Center for Food Nutrition and Human Health, Beijing*  
14 *Technology and Business University, Beijing 100048, P.R. China*

15 <sup>d</sup> *College of Bioscience and Resources Environment, Beijing University of Agriculture,*  
16 *Beijing 102206, P.R. China*

17

18 \*Corresponding author: Wenting Zhao, College of Bioscience and Resources

19 Environment, Beijing University of Agriculture, Beijing 102206, P.R. China; Tel:

20 +86-010-80727606; E-mail: 20158704@bua.edu.cn

21

22 Number of pages: 7                      Number of figures: 6

24

25

26

27

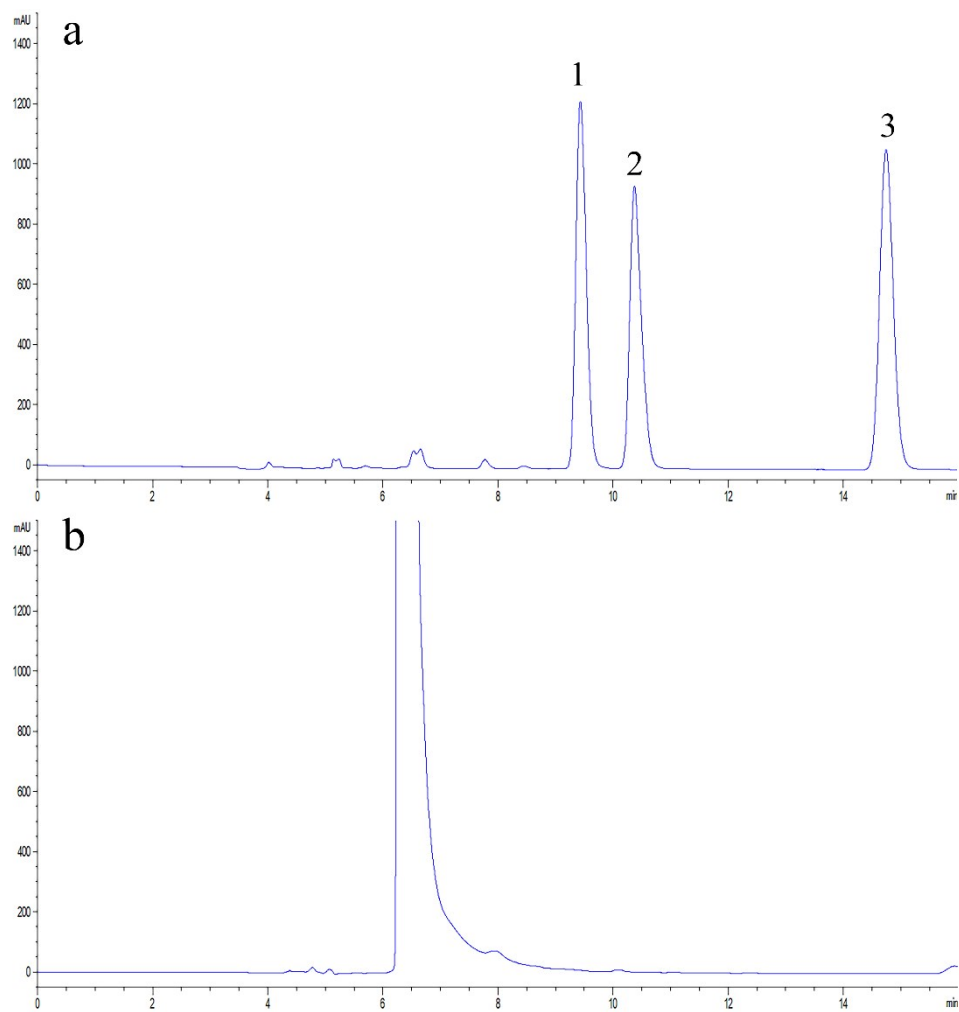

28

29 **Fig. S1.** Chromatograms of pyrethroids (a) and the blank sample after DES-DLLME-  
30 SFOD procedure (b). Peaks identification: 1, bifenthrin; 2,  $\beta$ -cypermethrin; 3,  
31 deltamethrin.

32

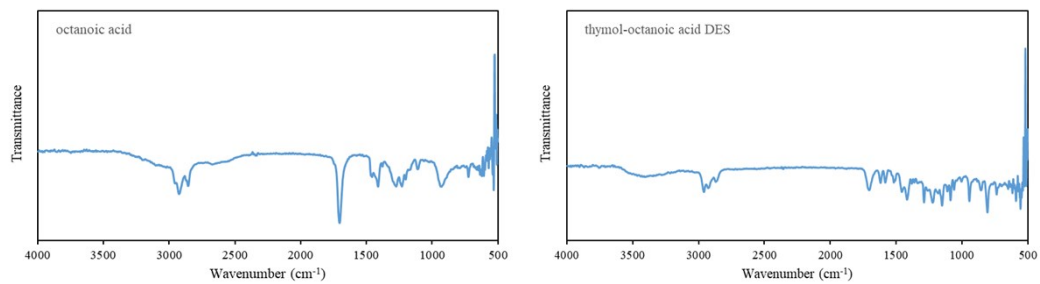

33

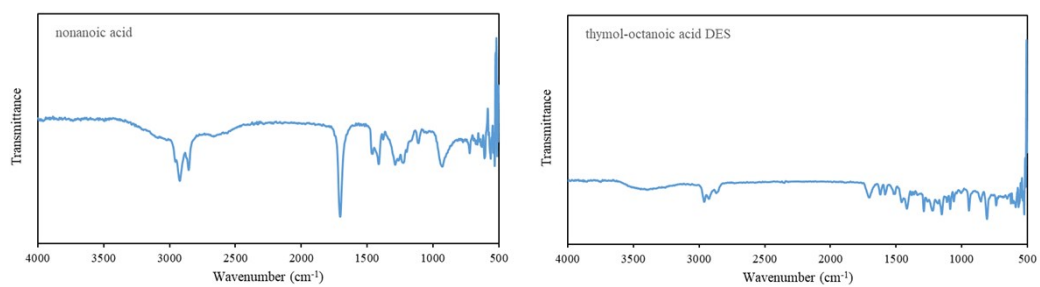

34

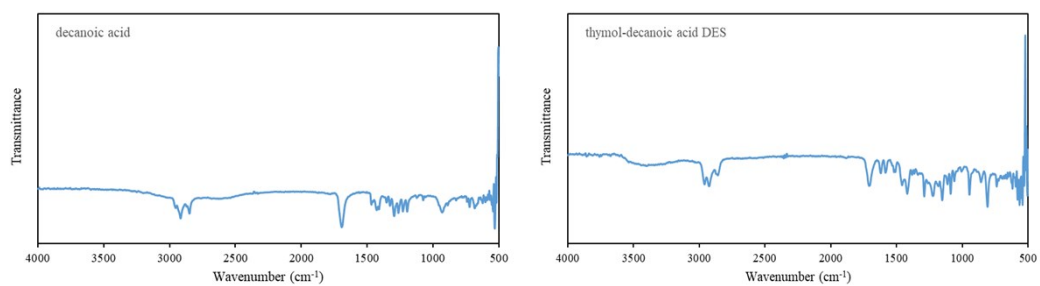

35

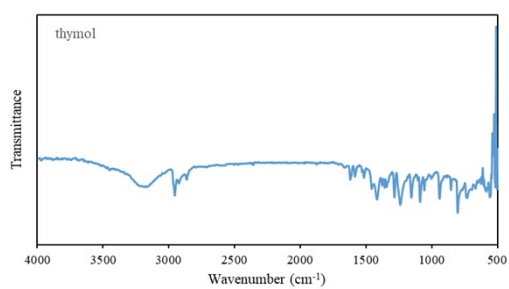

36

37

38 **Fig. S2.** FT-IR spectra of thymol, octanoic acid, nonanoic acid, decanoic acid, and  
39 DESs.

40  
41  
42  
43  
44

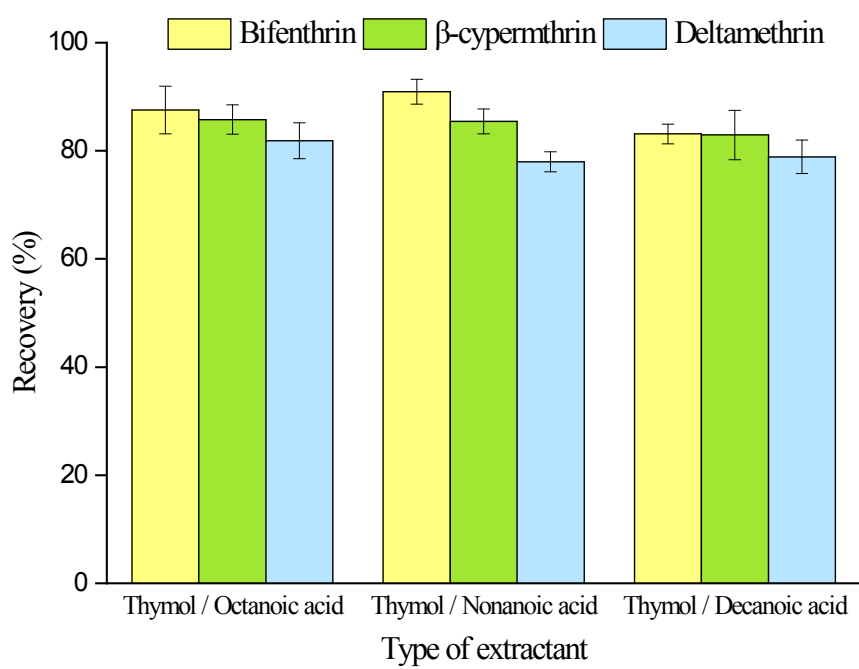

45  
46

**Fig. S3.** Effect of DES type.

48

49

50

51

52

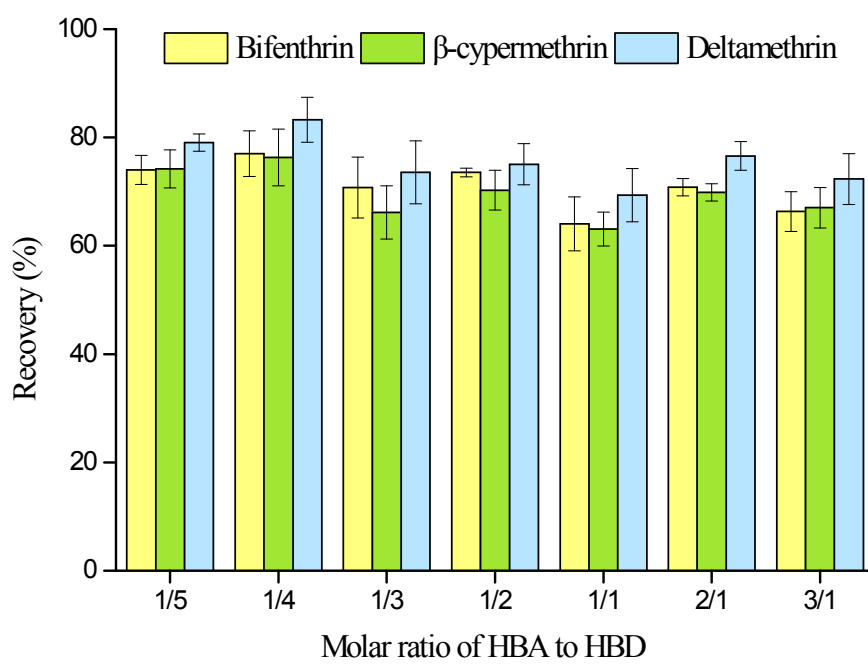

53

54

**Fig. S4.** Effect of molar ratio of HBA to HBD.

55

56

57

58

59

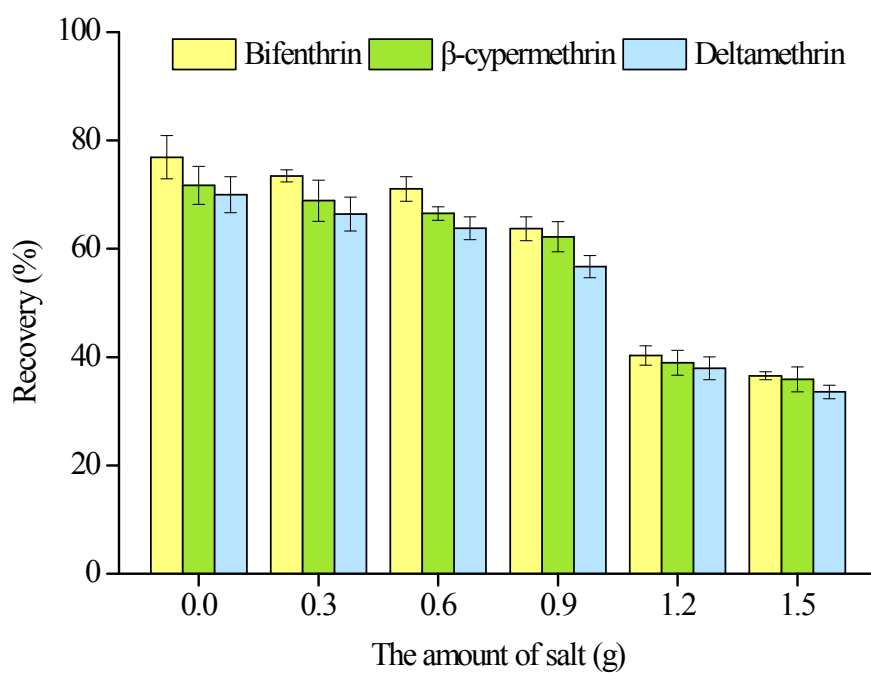

60

61

**Fig. S5.** Effect of salt addition.

63

64

65

66

67

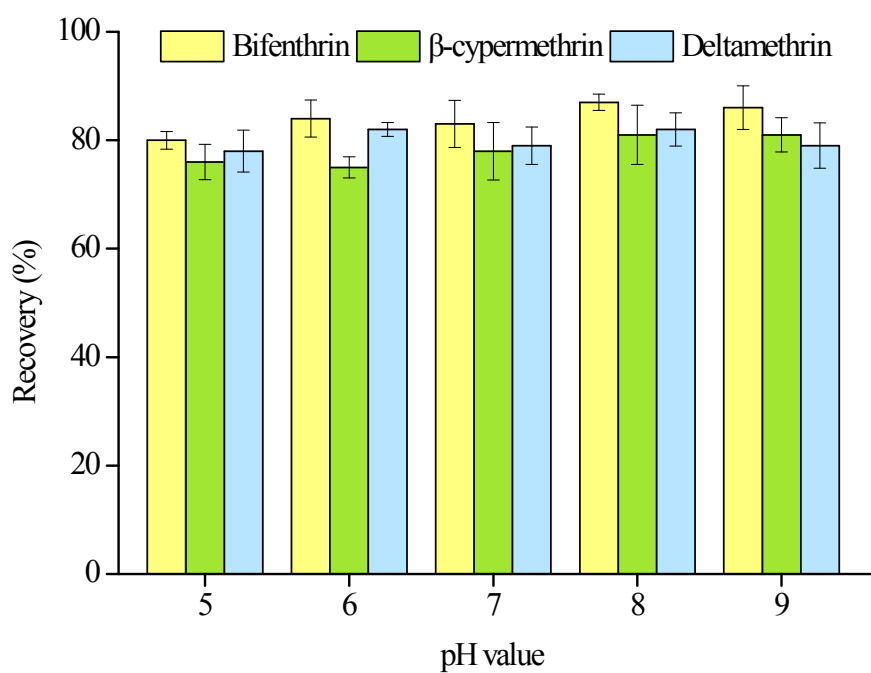

68

69

**Fig. S6.** Effect of pH value.
